# Supplementary material for: Murine intestinal stem cells are highly sensitive to modulation of the T3/TRα1-dependent pathway
Source: Oxford University Press journal article supplement (doi:10.1242/dev.194357), 2021-03-23
Supplement: dev194357supp.pdf [file dev194357supp.pdf]

**Godart et al, Figure S1**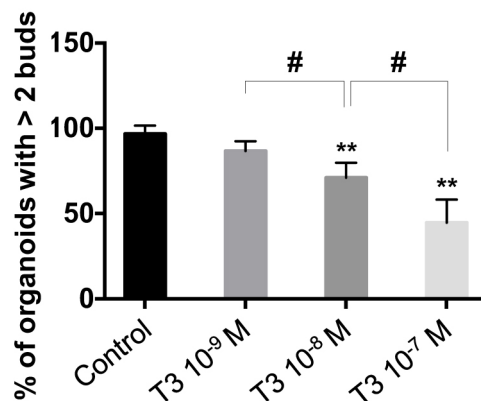

**Figure S1. Test of T3 concentrations on intestinal organoids.** Replicated organoids were maintained in control condition or treated with T3 at different concentrations ( $10^{-7}$  M,  $10^{-8}$  M and  $10^{-9}$  M), as indicated. The percentage of complex organoids ( $> 2$  buds) was analyzed at D4. Histograms represent mean  $\pm$  SD,  $n = 6$ . \*\*,  $P < 0.01$  compared to control; #,  $P < 0.05$  compared to the T3  $10^{-9}$  M condition. This experiment convinced us to choose the  $10^{-7}$  M concentration of T3 for all following experiments.

## Godart et al, Figure S2

**A**

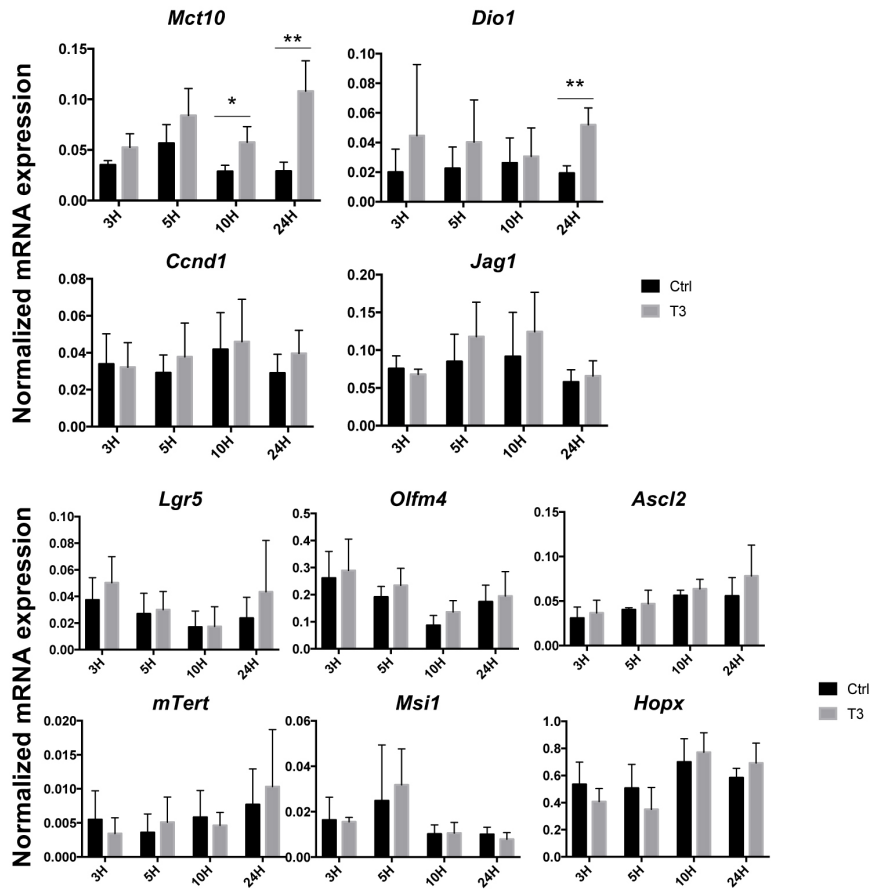

**B**

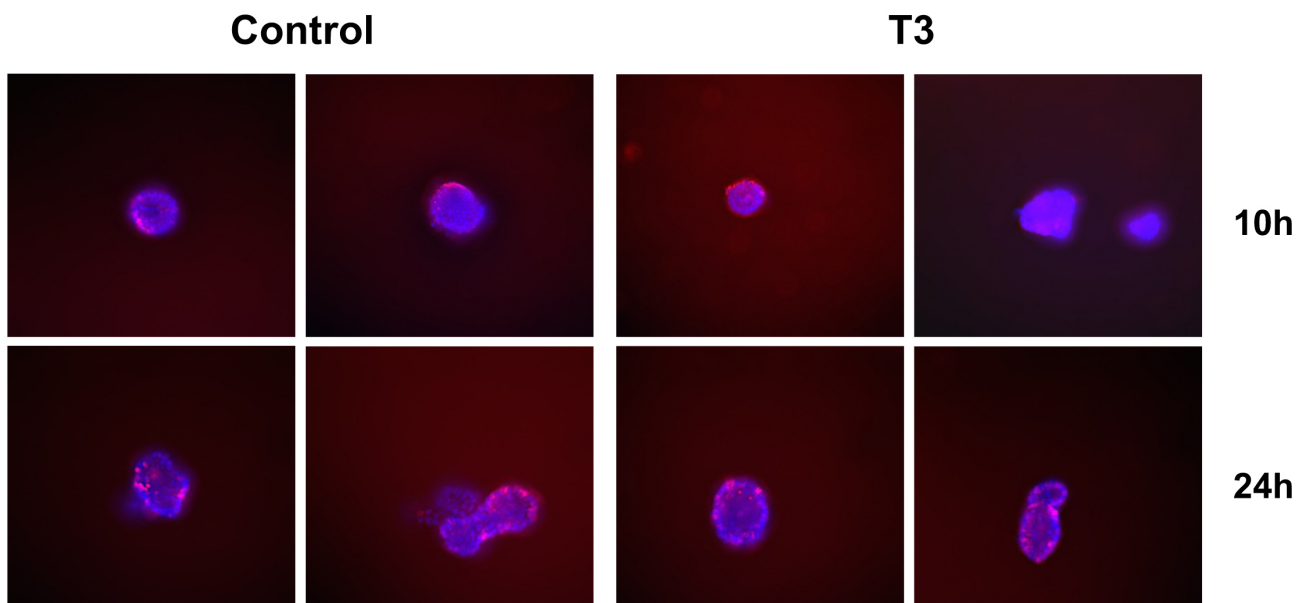

**Figure S2. Short-term treatment of TR $\alpha$ <sup>0/0</sup> organoids with T3.** A) Replicated TR $\alpha$ <sup>0/0</sup> organoids were cultured over 24 h in the absence (Control) or presence of 10<sup>-7</sup> M T3, as indicated. RT-qPCR experiments were performed at different time points, as indicated, to analyze the mRNA expression of the TH metabolizing enzyme *Dio1* and transporter *Mct10*; *Ccnd1* (Cyclin D1) was used as a proliferative marker and *Jag1* as a direct T3-target gene. In addition, stem cell markers *Lgr5*, *Olfm4*, *Ascl2*, *mTert*, *Msi1* and *Hopx* were also analyzed. Histograms represent mean  $\pm$  SD, n = 4, after normalization against *Ppib*. \*,  $P < 0.05$ , \*\*,  $P < 0.01$  compared to the respective control conditions. B) Proliferation analysis by EdU incorporation was performed on organoids in control condition or treated with T3 for 10 h or 24 h; in both cases EdU was added in the culture medium 2 h before ending cultures. Images show merged EdU labeling (red) and nuclear staining (blue). Bar = 7  $\mu$ m.

### Godart et al, Figure S3

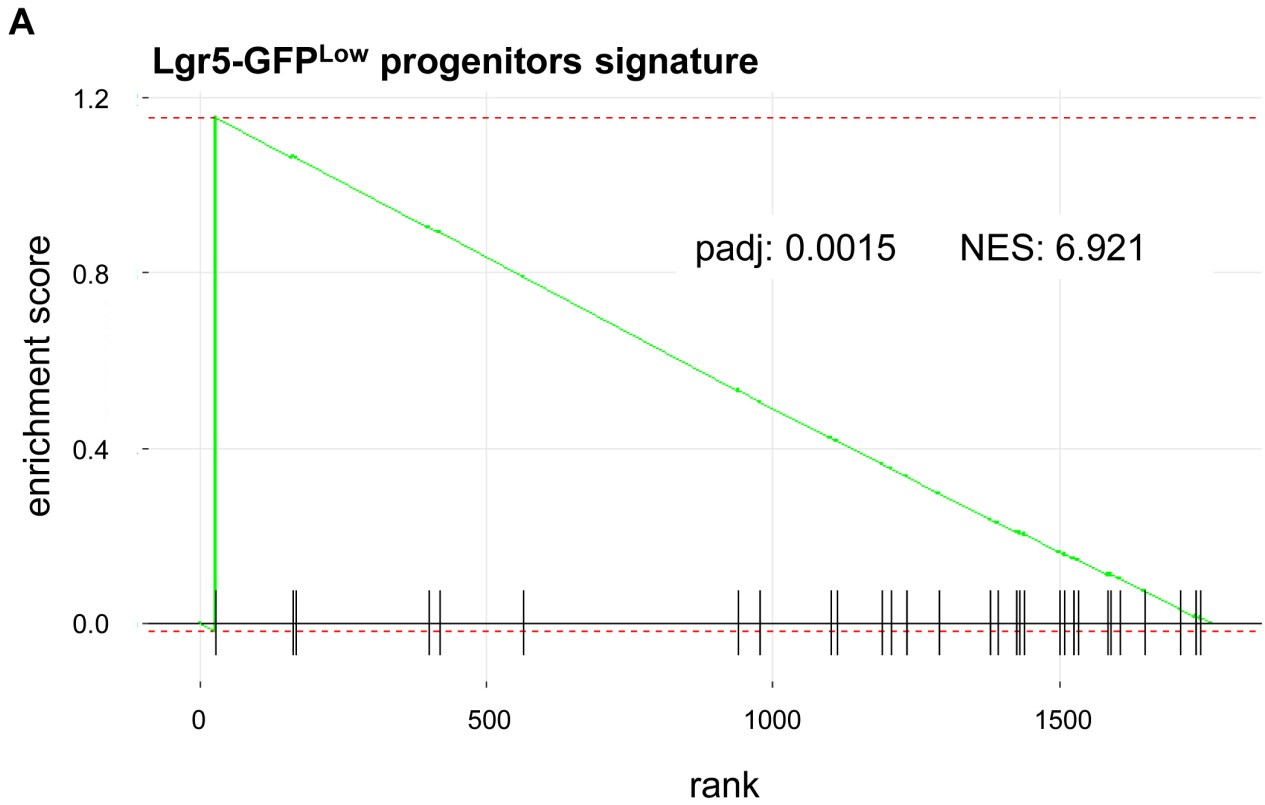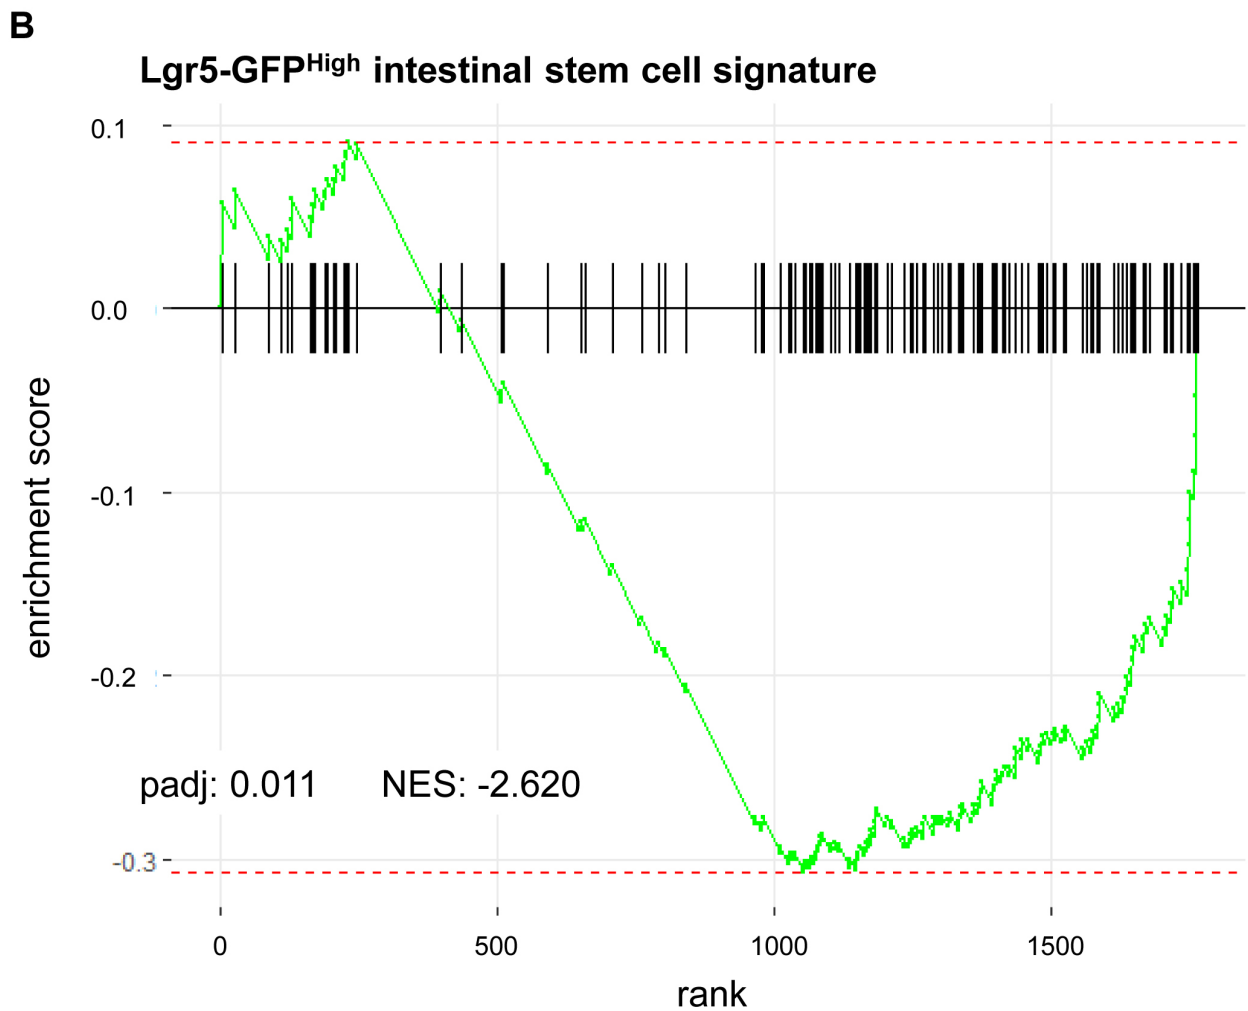

**Figure S3. Gene set enrichment analysis (GSEA).** Genes are ranked according to their differential expression between T3-treated and control organoids. Image showing the comparison of our DE genes and the genes characterizing progenitors (A) or the genes characterizing intestinal stem cell signature described in Munoz et al., 2012 (B). Black bars below each graph depict the position of common genes. NES: normalized enrichment score.

## Godart et al, Figure S4

**A**

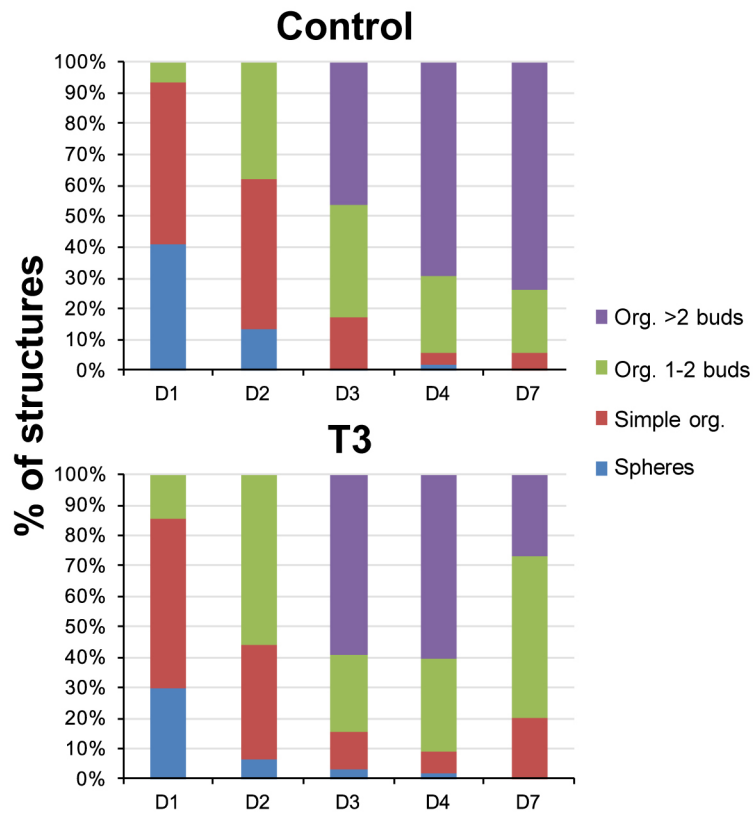

**B**

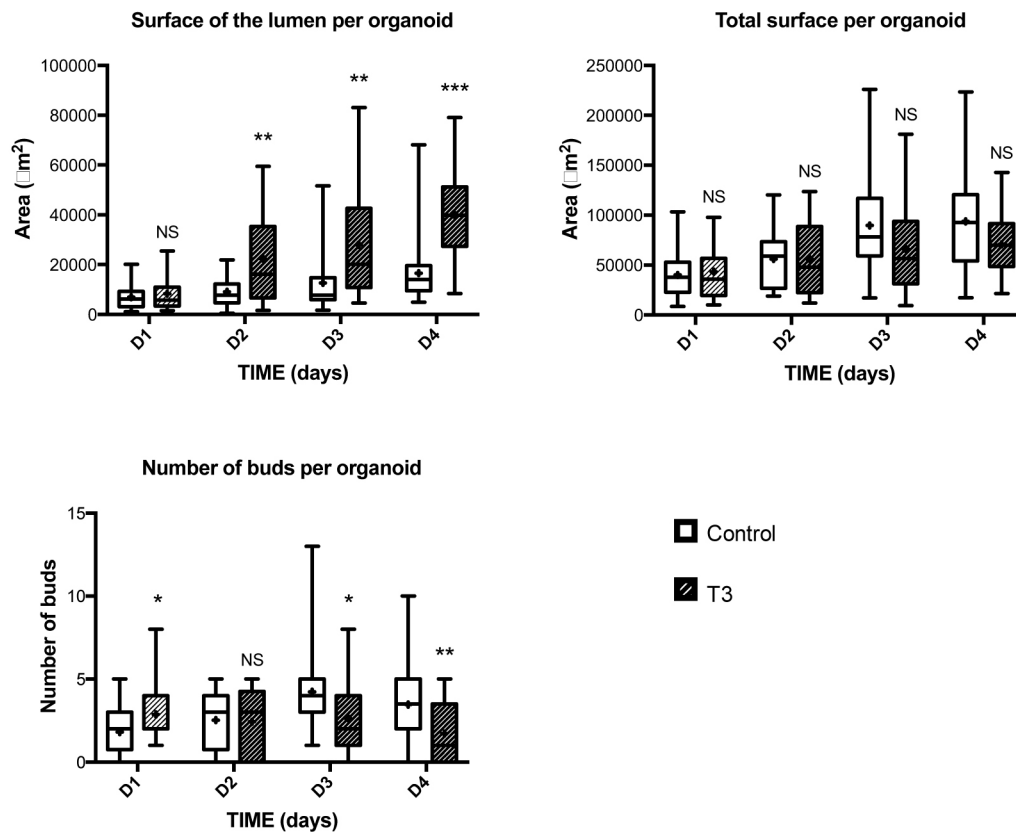

**Figure S4. Complementary growth properties and features of cultured crypts upon T3 treatment.** Crypts were prepared from *Lgr5*-EGFP intestine and maintained in culture for several days in the absence (Control) or presence of  $10^{-7}$  M T3, as indicated. A) Multilayered histograms represent the mean  $\pm$  SD,  $n = 6$ , of each counted structure in the cultured crypts in control or T3 condition. The percentage of spheres, simple organoids, 1-2 bud organoids and more complex organoids ( $> 2$  buds) was evaluated every day for 1 week. D, days in culture. B) Analysis of the lumen size, the total size and the number of buds per organoid was performed on representative images taken under the inverted microscope by using the ImageJ software. 30-50 organoid per day and per condition were analyzed. D, days in culture. NS, not significant; \*,  $P < 0.05$ , \*\*,  $P < 0.01$  and \*\*\*,  $P < 0.001$  compared to the respective control conditions.

Godart et al, Figure S5

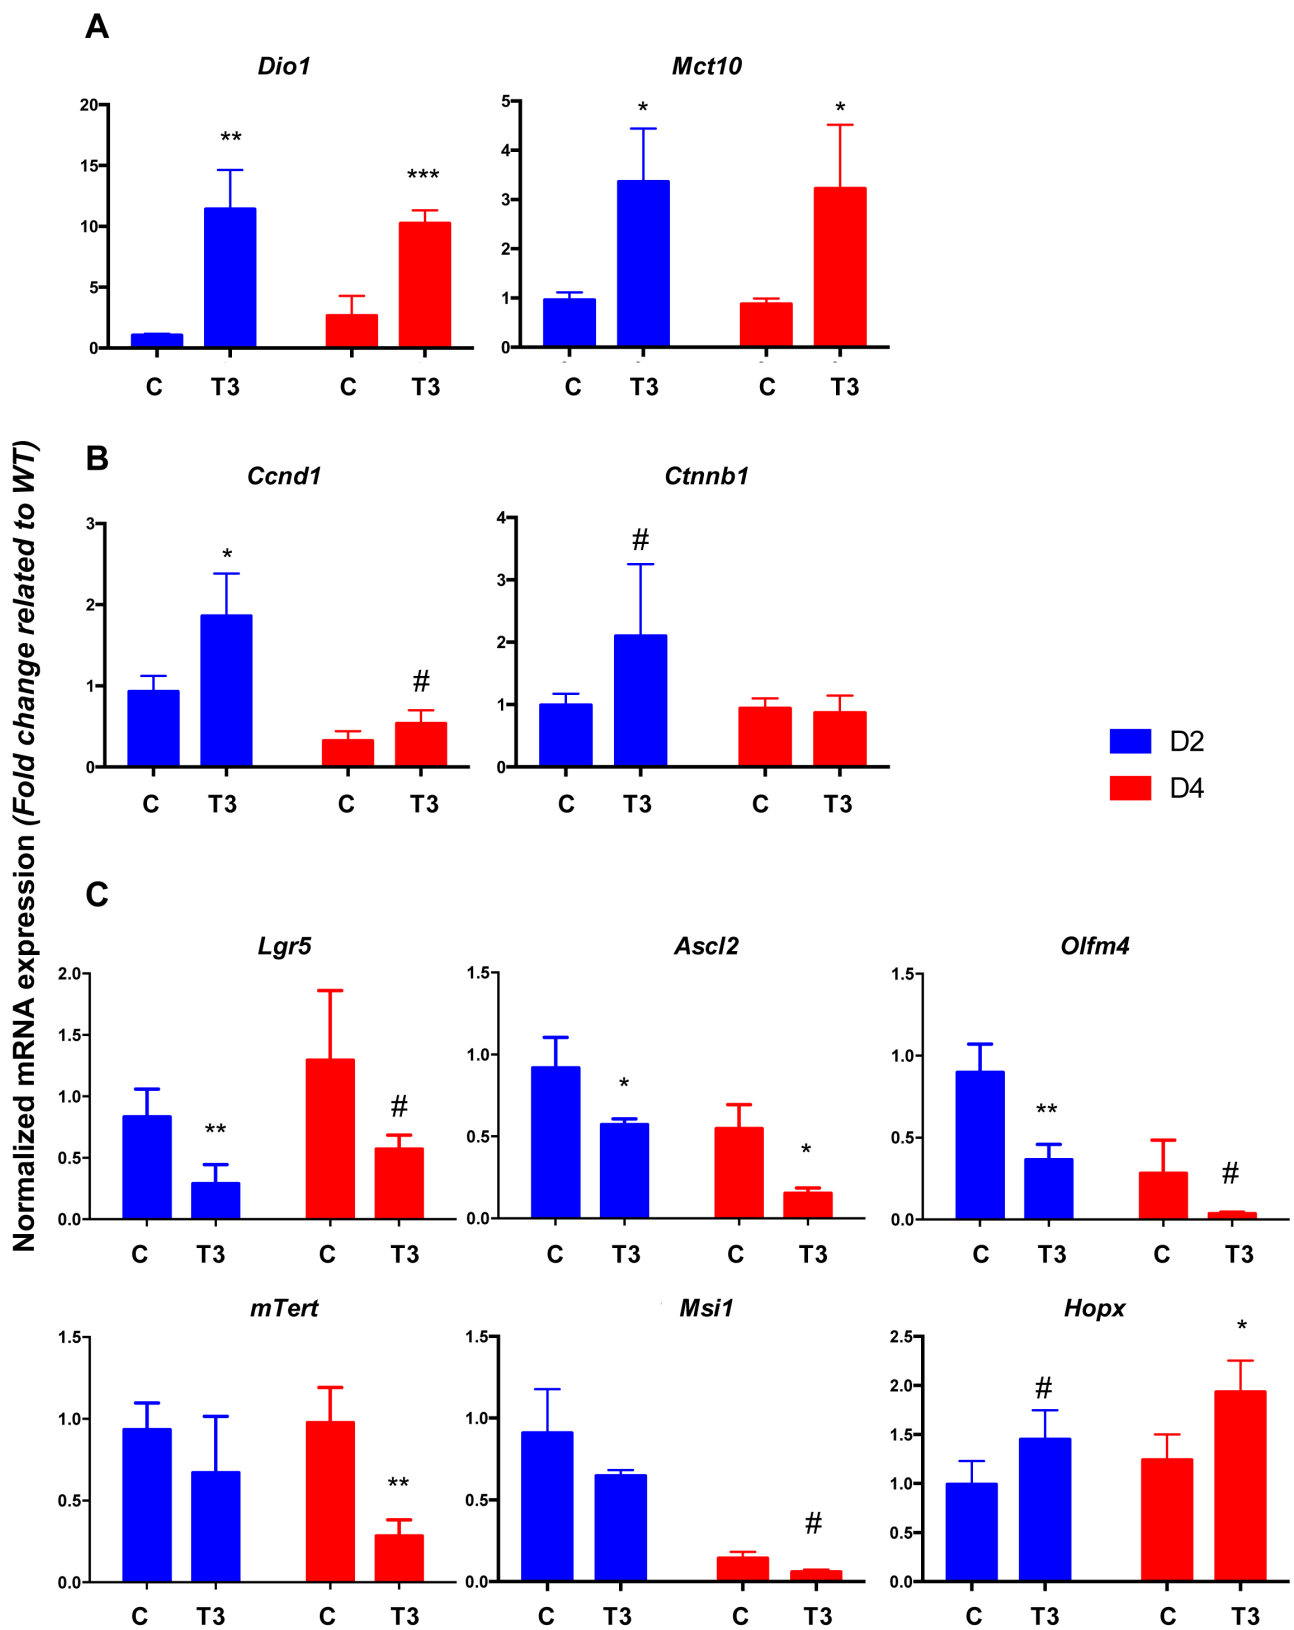



**Figure S5. Complementary molecular analyses of T3-treated organoids.** Replicated *Lgr5*-EGFP organoids were cultured in the absence (C, control) or presence of  $10^{-7}$  M T3 (T3), as indicated, for 2 (D2) and 4 days (D4). RT-qPCR experiments were performed to analyze the expression of TH metabolizing enzyme mRNA *Dio1* and transporter *Mct10* (A); *Ccnd1* (Cyclin D1) was used as proliferative marker and *Ctnnb1* ( $\beta$ -catenin) as a direct T3-target gene (B). C) Analysis of stem cell markers *Lgr5*, *Olfm4*, *Ascl2*, *mTert*, *Msi1* and *Hopx*. Histograms represent mean  $\pm$  SD, n = 4, after normalization against *Ppib*. The expression value of each gene is represented as fold change related to the control condition at D2. \*,  $P < 0.05$ , \*\*,  $P < 0.01$  and \*\*\*,  $P < 0.001$  compared to the respective control conditions. #: marginally significant compared to the respective control conditions.

## Godart et al, Figure S6

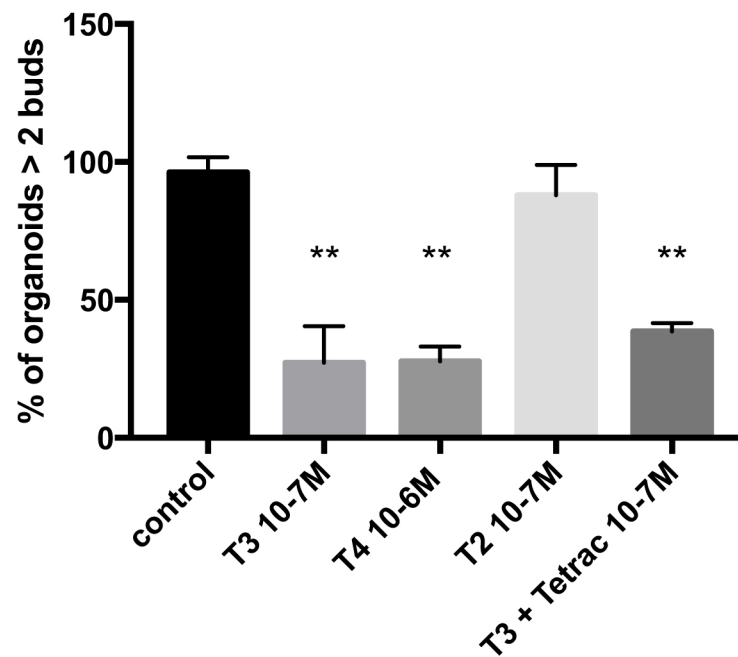

**Figure S6. Analysis of different TH-related molecules in organoids.** Replicated *Lgr5*-EGFP organoids were maintained in control, T3 ( $10^{-7}$  M), T4 ( $10^{-6}$  M), 3,3'-T2 ( $10^{-7}$  M) or T3 and Tetrac ( $10^{-7}$  M) (T3+Tetrac). The percentage of complex organoids (> 2 buds) was analyzed at D4. Histograms represent mean  $\pm$  SD, n = 6. \*\*,  $P < 0.01$  compared to the control or to the T2 condition.

### Godart et al, Figure S7

**A**

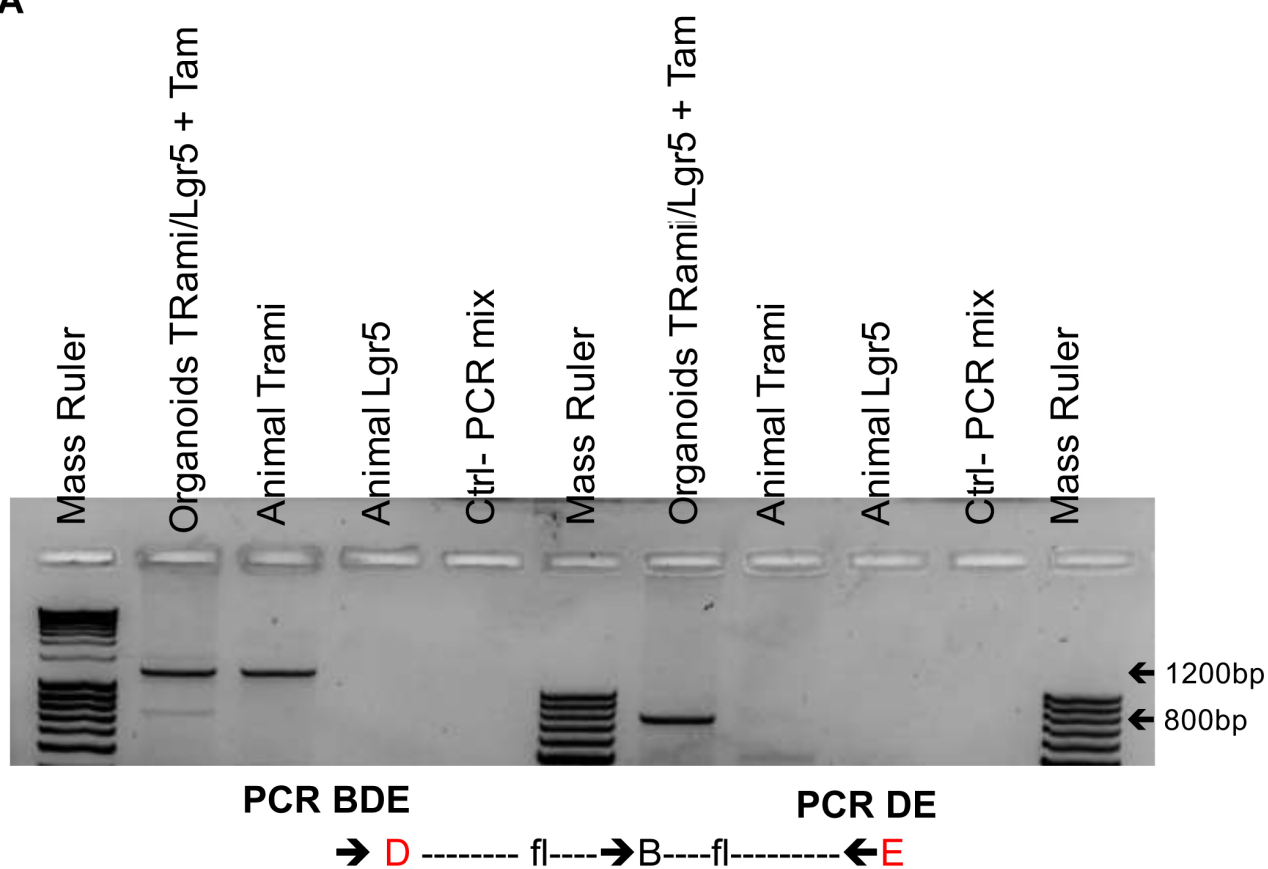

1200 bp : Non-recombined TRami allele

800 bp : Recombined TRami allele and expression of the TRami

**B**

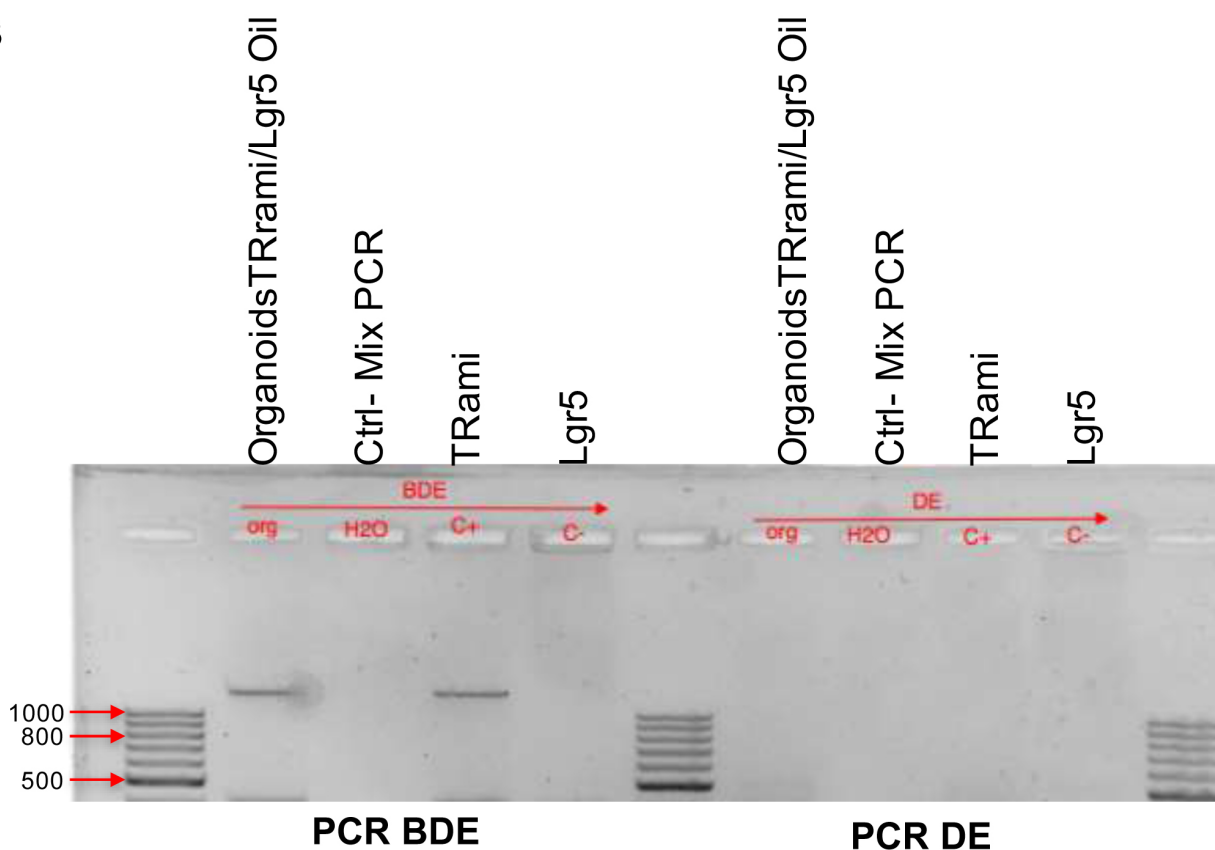

**Figure S7. Generation and validation of the TRami/*Lgr5*-EGFP/*Rosa*-Tomato animals and organoids.** PCR analysis on gDNA from triple transgenic TRami/*Lgr5*-EGFP/*Rosa*-Tomato organoids from previously tamoxifen- (A) or oil- (B) injected animals. Recombination of gDNA was evaluated after 4 days of culture and compared to controls (gDNA extracted from intestine of TRami or *Lgr5*-EGFP mice, PCR Mix). Combination of two (DE) or three (BDE) primers was used to amplify gDNA by PCR. In the presence of tamoxifen, 800 bp amplicons were detected, revealing the presence of the recombined TRami allele (A) whereas they were not detected when mice were injected with oil (B).

Godart et al, Figure S8

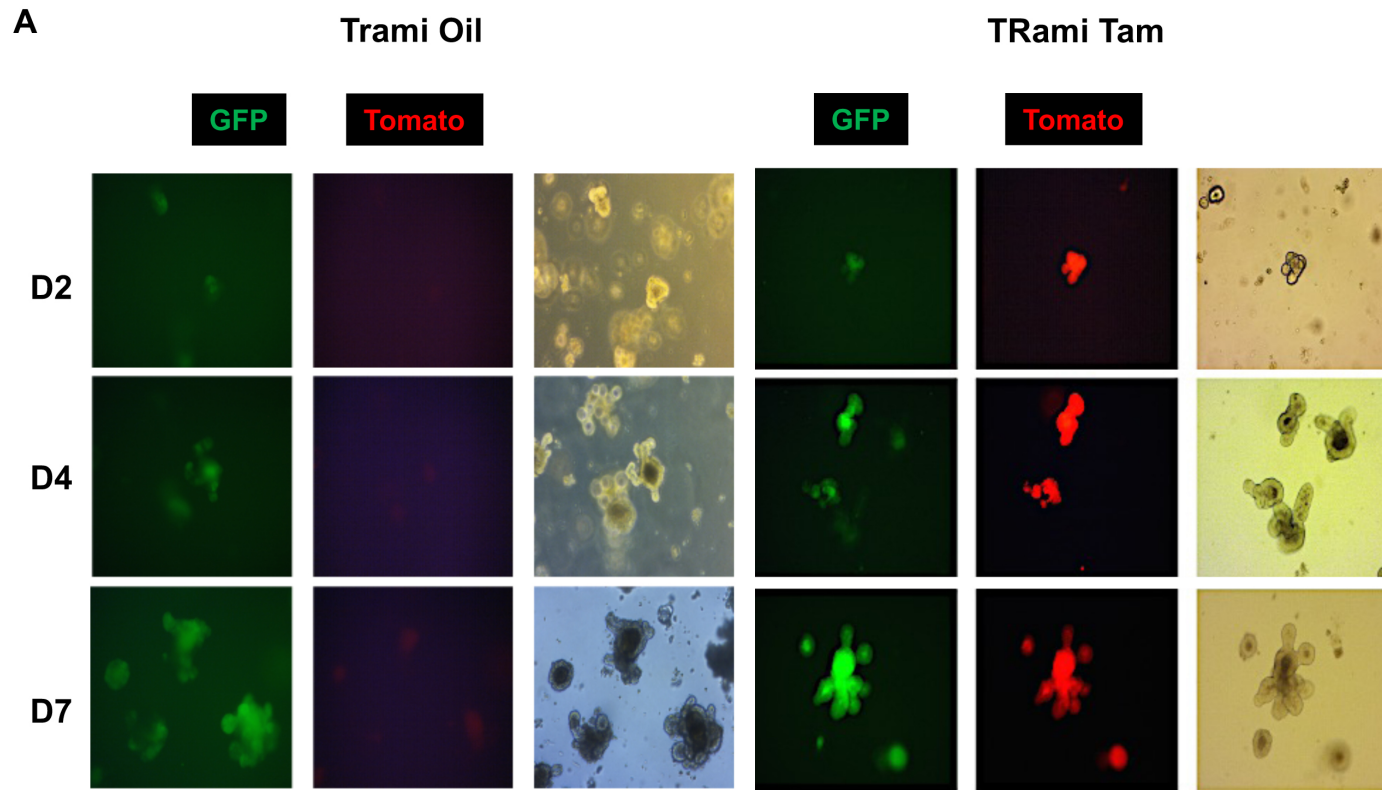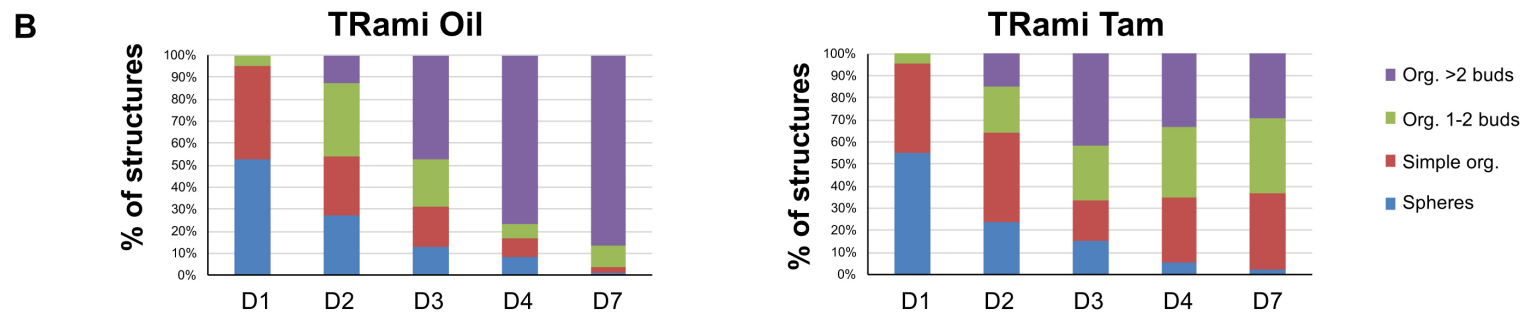

**Figure S8. Complementary phenotypic analysis of the TRami/*Lgr5*-EGFP/*Rosa*-Tomato organoids.** A) Live GFP and RFP fluorescence analysis of fresh triple transgenic organoids established from tamoxifen- or oil-injected mice, as indicated, and observed at D2, D4 and D7. D, days in culture. In TRami/*Lgr5*-EGFP/*Rosa*-Tomato animals, tamoxifen injections induced deletion of floxed sites enabling the expression of the Tomato protein (red fluorescence) as well as of the TRami allele. No recombination could be observed in organoids established from oil-treated animals, confirmed by the absence of Tomato signal. Left: GFP, Middle: Tomato, Right: Brightfield. Pictures have been taken under an inverted microscope at the indicated days after the start of the culture, and are representative of two independent experiments, each conducted on six replicates (Bar = 50  $\mu$ m). B) Multilayered histograms represent the mean  $\pm$  SD, n = 6, of each counted structure in the cultured crypts in oil or Tam condition. The percentage of spheres, simple organoids, 1-2 bud organoids and more complex organoids (> 2 buds) was evaluated every day for 1 week. D, days in culture.

## Godart et al, Figure S9

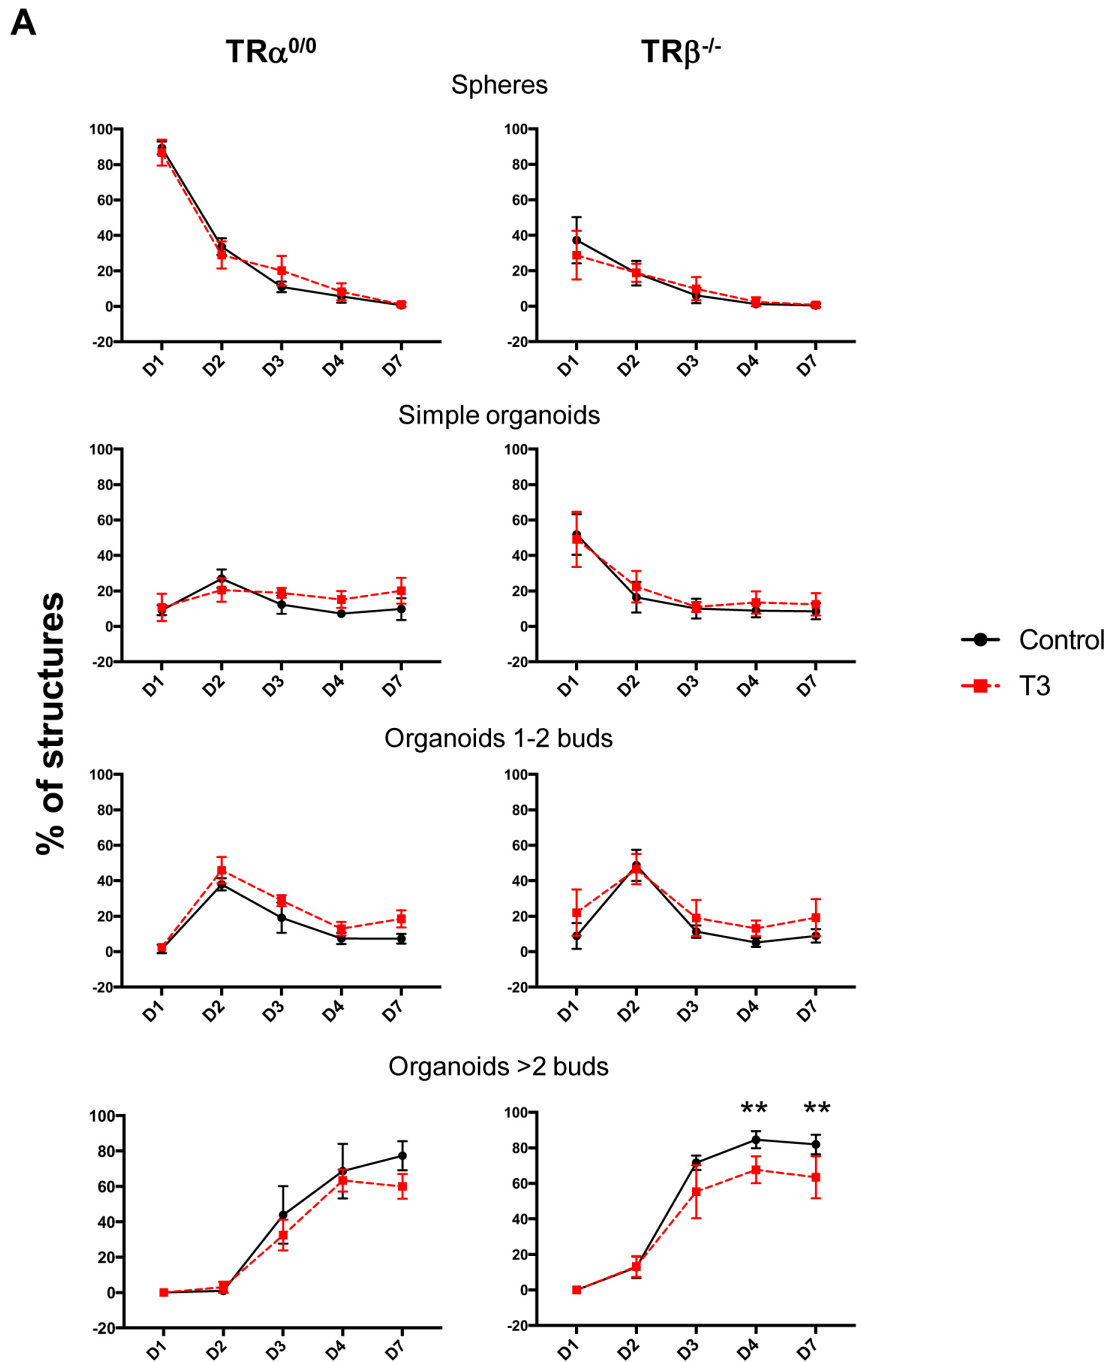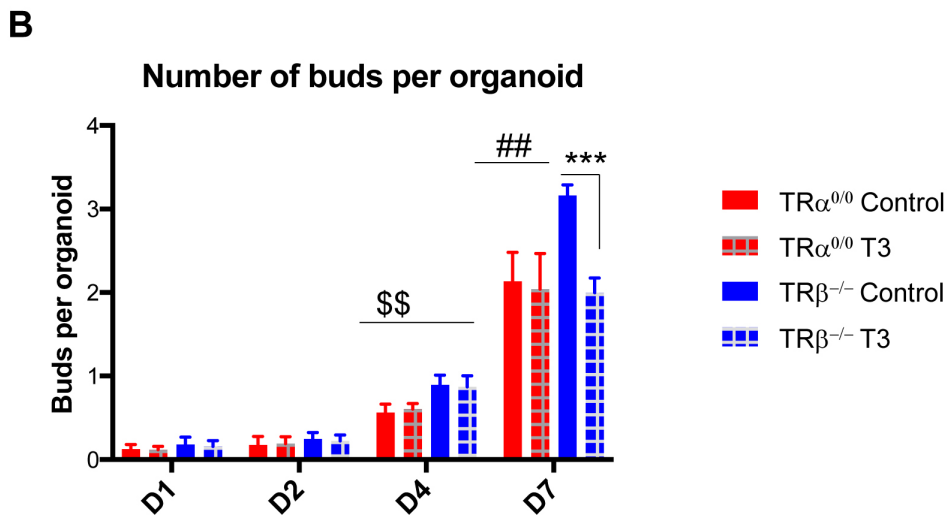

**Figure S9. Complementary analyses on organoids from TR $\alpha$ <sup>0/0</sup> and TR $\beta$ <sup>-/-</sup> mice.** A) Crypts were prepared from TR $\alpha$ <sup>0/0</sup> and TR $\beta$ <sup>-/-</sup> intestine and maintained in culture for several days in the absence (Control) or presence of 10<sup>-7</sup> M T3, as indicated. The number of simple structures (spheres) or organoids of increasing complexity (1 or 2 buds, more than 2 buds) in control and T3 condition, as indicated, were scored under the inverted microscope during seven days of culture. Graph lines represent the mean  $\pm$  SD, n = 6, of each structure counted in the cultures from different genotypes and conditions. \*\*, *P* < 0.01 compared to the respective control condition. B) The number of buddings per organoid was scored at different time points in cultured organoids of different genotypes in control and T3 conditions, as indicated. Histograms represent mean  $\pm$  SD, n = 20. \$\$, *P* < 0.01 compared to TR $\beta$ <sup>-/-</sup> control or T3 conditions; ##, *P* < 0.01 compared to the TR $\beta$ <sup>-/-</sup> control condition; \*\*, *P* < 0.01 compared to the control condition of the same genotype.



## Godart et al, Figure S10

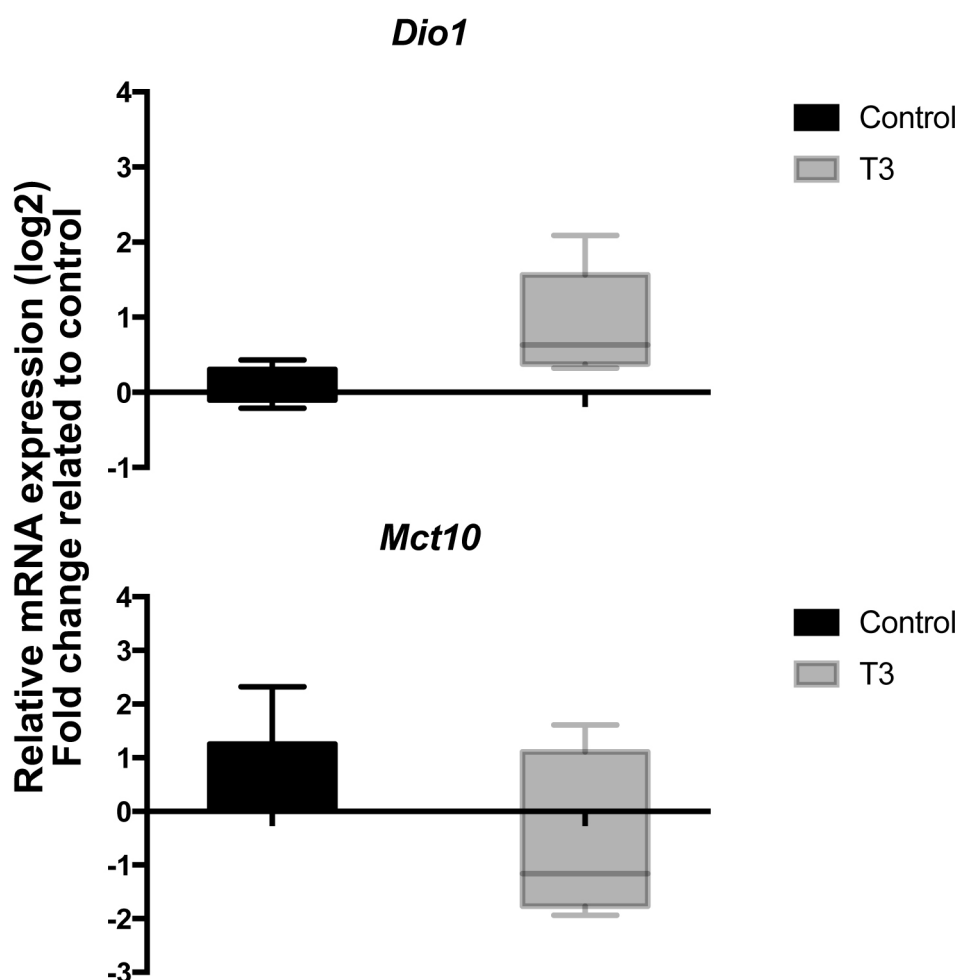

**Figure S10. Effect of T3 treatment *in vivo* on *Dio1* and *Mct10* mRNA expression.** A) RT-qPCR experiments to analyze the expression of TH metabolizing enzyme *Dio1* and transporter *Mct10* mRNAs. The study was performed on RNA extracted from the distal small intestinal mucosa. Boxplots show the distribution of data and the mean  $\pm$  SD,  $n = 6$ , after normalization against *Ppib*. Data are represented as fold change relative to the control condition.

## Godart et al, Figure S11

A

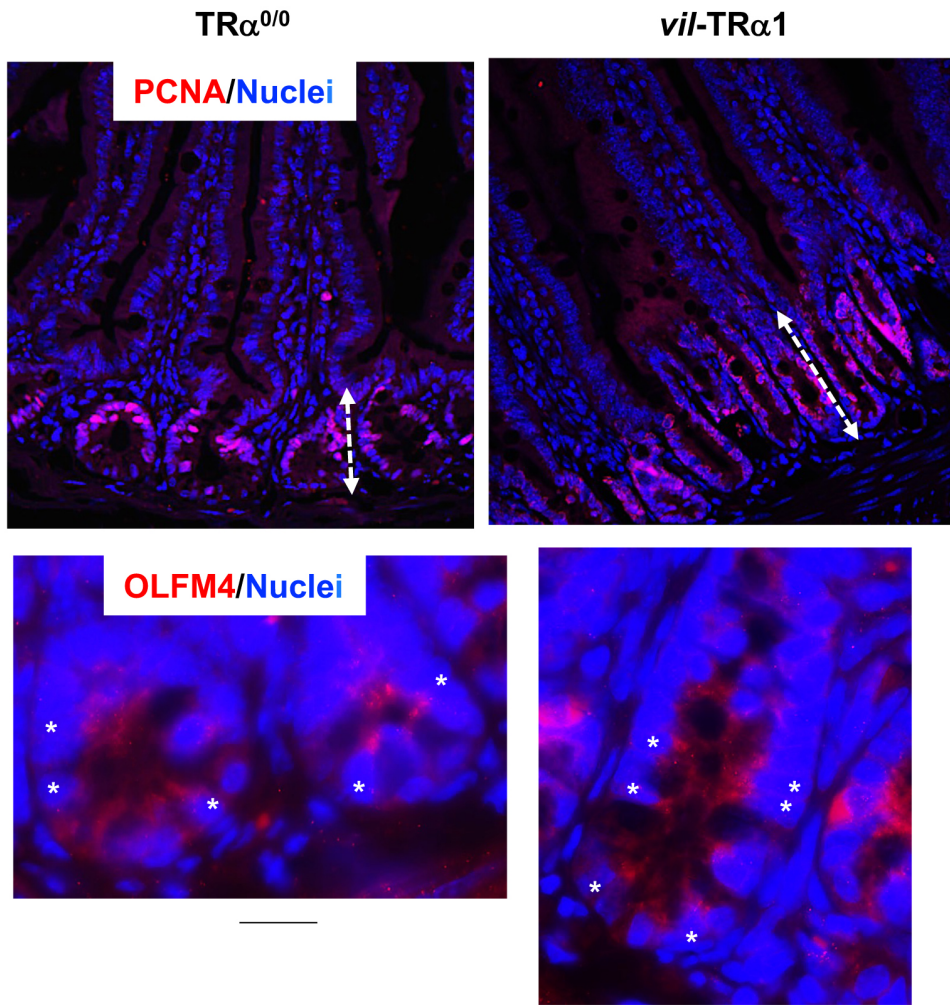

B

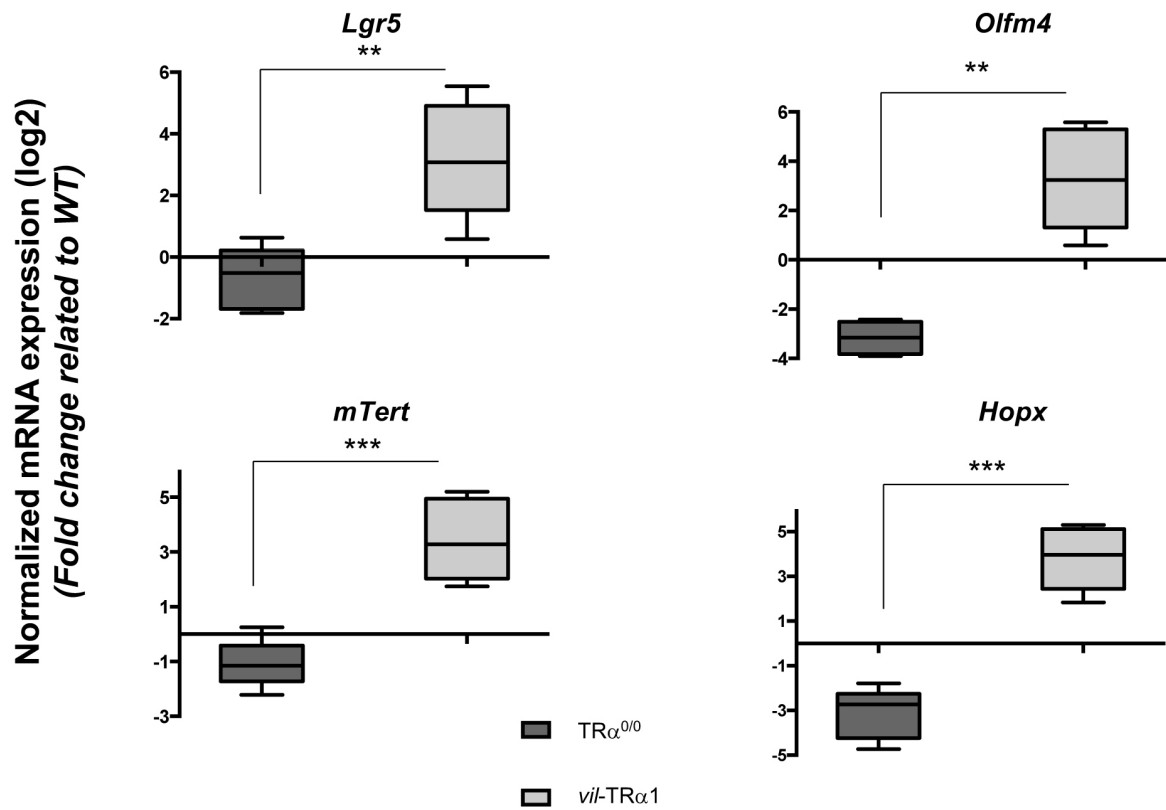

**Figure S11. TR $\alpha$ 1 modulation *in vivo* affects intestinal stem cells.** A) Analysis of PCNA-positive proliferating cells (upper panels) or OLFM4-positive stem cells (lower panels) in distal small intestinal sections from TR $\alpha$ <sup>0/0</sup> and *vil*-TR 1 animals, representing models of constitutive TR $\alpha$ -knockout and TR $\alpha$ 1-targeted overexpression, respectively (Gauthier et al, 2001; Kress et al, 2010). The images show merged PCNA or OLFM4 (red) and nuclear staining (blue). Pictures are representative of three different animals per condition. Bar PCNA = 10  $\mu$ m; bar OLFM4 = 5  $\mu$ m. The white dotted double-arrow indicates the PCNA-positive crypt length; white asterisks point to OLFM4-positive cells. B) RT-qPCR analysis on stem cell markers *Lgr5*, *Olfm4*, *Hopx* and *mTert*. The study was performed on RNA extracted from the distal small intestinal mucosa. Boxplots show the distribution of data and the mean  $\pm$  SD, n = 6, after normalization against *Ppib*. Data are represented as fold change relative to the control condition.

**Table S1. Differentially-expressed genes between T3-treated and control organoids.**

[Click here to download Table S1](#)

**Table S2. Comparative analyses between T3-treated and control organoids vs SC or progenitor gene signatures.**

[Click here to download Table S2](#)

**Table S3: Genes specifically expressed in Progenitor cells.**

[Click here to download Table S3](#)

**Table S4. Comparative analyses between T3-treated and control organoids vs genes described in Kress et al., 2009.**

| Gene Symbol   | Kress 2009  | RNA-seq 2019 | Function                                                                                             |
|---------------|-------------|--------------|------------------------------------------------------------------------------------------------------|
| Acot1         | down        | down         | Palmitoyl-CoA hydrolase activity; hydrolase activity                                                 |
| Acss1         | down        | down         | Acetyl-CoA biosynthetic process; metabolic process                                                   |
| Adh1          | down        | down         | Retinoid metabolic process; alcohol dehydrogenase (NAD) activity; retinol dehydrogenase activity     |
| Akr1c13       | down        | down         | Xenobiotic metabolic process; oxidation-reduction process                                            |
| Aldh1a1       | down        | down         | Retinol metabolic process; retinoic acid metabolic process; 9-cis-retinoic acid biosynthetic process |
| Aldh1a7       | down        | down         | Retinoic acid metabolic process                                                                      |
| Amn           | down        | down         | Cell adhesion/extracellular matrix                                                                   |
| Apobec1       | up          | up           | Nucleic acid metabolism; mRNA processing                                                             |
| Apobec3       | up          | up           | Nucleic acid metabolism                                                                              |
| Armcx1        | down        | down         | Membrane proteins/transporters                                                                       |
| Atp13a3       | down        | down         | Cation transport; cellular calcium ion homeostasis                                                   |
| Bmp7          | down        | down         | Transforming growth factor beta receptor binding; growth factor activity; BMP receptor binding       |
| Cat           | down        | down         | Stress and apoptosis                                                                                 |
| Cldn8         | down        | down         | Cell adhesion/extracellular matrix                                                                   |
| Cxcr5         | down        | down         | Transcriptional regulation                                                                           |
| Cytc          | up          | up           | Metabolism; cytochrome c oxidase complex activity                                                    |
| Dab1          | down        | down         | Cell adhesion/extracellular matrix                                                                   |
| Dhrs7         | up          | up           | Metabolic process; oxidation-reduction process                                                       |
| Dock5         | up          | up           | Cell cycle control/proliferation                                                                     |
| Elovl6        | up          | up           | Fatty acid elongase activity; transferase activity                                                   |
| <b>Fgf1</b>   | <b>down</b> | <b>up</b>    | <b>Intestinal crypt formation; response to irradiation</b>                                           |
| Faah          | down        | down         | Fatty acid catabolic process                                                                         |
| Fmo5          | down        | down         | Oxidoreductase activity and NADP binding                                                             |
| Fos           | up          | up           | Proto-Oncogene, Transcription Factor                                                                 |
| <b>Gcnt2</b>  | <b>down</b> | <b>up</b>    | <b>Remodeling glycans; barrier function; regulating Muc expression</b>                               |
| Gng10         | up          | up           | G protein, involved as a modulator or transducer in various transmembrane signaling systems          |
| Gp1bb         | up          | up           | Transmembrane signaling receptor activity                                                            |
| Gpx2          | up          | up           | Detoxification of Reactive Oxygen Species                                                            |
| Gsta1         | up          | up           | Glutathione transferase activity                                                                     |
| Gstm4         | down        | down         | Glutathione transferase activity                                                                     |
| Higd1a        | up          | up           | Mitochondrial respiratory chain that catalyzes the reduction of oxygen                               |
| Hmgcs2        | down        | down         | Mitochondrial enzyme that catalyzes the first reaction of ketogenesis                                |
| ldh3a         | up          | up           | Pyruvate metabolism and Citric Acid (TCA) cycle                                                      |
| Kcne3         | up          | up           | Voltage-gated potassium channel activity                                                             |
| Klf9          | up          | up           | Regulation of transcription; cellular response to thyroid hormone stimulus                           |
| Lbp           | up          | up           | Liver development; lipid transport; inflammatory response                                            |
| Letm1         | up          | up           | Protein binding; metal ion binding                                                                   |
| Marcks11      | down        | down         | Positive regulation of cell proliferation                                                            |
| Nnt           | dwn         | down         | NADPH regeneration; proton transport; cell redox homeostasis                                         |
| <b>Notch1</b> | <b>up</b>   | <b>down</b>  | <b>Stem cell biology; activation in enterocyte progenitor</b>                                        |
| Psmb8         | up          | up           | Threonine-type endopeptidase activity                                                                |
| Pxmp4         | down        | down         | Peroxisomal membrane; protein binding                                                                |
| Sesn1         | up          | up           | Regulation of protein kinase B signaling; regulation of response to reactive oxygen species          |
| Sh3bgr        | up          | up           | SH3 domain binding                                                                                   |
| Slc13a1       | up          | up           | Sodium-sulfate symporter activity                                                                    |
| Stard5        | down        | down         | Lipid transport; lipid binding; cholesterol binding; bile acid binding                               |
| Steap1        | up          | up           | Ion transport; oxidoreductase activity                                                               |
| Tcf23         | down        | down         | Protein dimerization activity                                                                        |
| Tcf4          | down        | down         | Transcription factor activity                                                                        |
| Tgfb1         | up          | up           | Collagen binding; cell adhesion molecule                                                             |
| Tlr3          | up          | up           | Toll-like receptor signaling pathway; involved in immune response                                    |
| Tnfrsf14      | up          | up           | Tumor necrosis factor-activated receptor activity; protein binding                                   |
| Ttr           | down        | down         | Hormone binding; protein binding; thyroid hormone binding                                            |
| Upp1          | up          | up           | Catalytic activity; uridine phosphorylase activity; transferase activity                             |

**Table S5: Expression of *Thra* gene in different crypt populations.**

|                                                                                                                     |                       |                                                 |                                           |                                                                          |  |
|---------------------------------------------------------------------------------------------------------------------|-----------------------|-------------------------------------------------|-------------------------------------------|--------------------------------------------------------------------------|--|
| <b>GSE25109 - Stem Cells - Present Genes*</b>                                                                       |                       | <b>GSE25109 - Paneth Cells - Present Genes*</b> |                                           | <i>* Present Gene = flagged as "P" in 4/4 samples</i>                    |  |
| <b>GeneName</b>                                                                                                     |                       | <b>GeneName</b>                                 |                                           |                                                                          |  |
| Thra                                                                                                                |                       | Thra                                            |                                           |                                                                          |  |
| <b>GSE23672 -GFPHigh - Present Genes*</b>                                                                           |                       | <b>GSE23672 - Low - Present Genes*</b>          |                                           | <i>* Present Gene = flagged as "P" in 4/4 samples</i>                    |  |
| <b>GeneName</b>                                                                                                     |                       | <b>GeneName</b>                                 |                                           |                                                                          |  |
| Thra                                                                                                                |                       | Thra                                            |                                           |                                                                          |  |
| <b>GSE25109 - Differential analysis - Stem Cells vs. Paneth Cells (Fold-Change &gt; 1.5 &amp; Pvalue &lt; 0.05)</b> |                       |                                                 |                                           |                                                                          |  |
| <b>GeneName</b>                                                                                                     | <b>SystematicName</b> | <b>Fold-Change (StemCells vs PanethCells)</b>   | <b>P-value (StemCells vs PanethCells)</b> | <b>Description</b>                                                       |  |
| Thra                                                                                                                | NM_178060             | 2.20145311274614                                | 0.00459508961922441                       | ref Mus musculus thyroid hormone receptor alpha (Thra), mRNA [NM_178060] |  |
| <b>GSE23672 - Differential analysis - High vs. Low (Fold-Change &gt; 1.5 &amp; Pvalue &lt; 0.05)</b>                |                       |                                                 |                                           |                                                                          |  |
| <b>GeneName</b>                                                                                                     | <b>SystematicName</b> | <b>Fold-Change (High vs Low)</b>                | <b>P-value (High vs Low)</b>              | <b>Description</b>                                                       |  |
| Thra                                                                                                                | NM_178060             | 1.60923971813349                                | 0.0129884032909439                        | ref Mus musculus thyroid hormone receptor alpha (Thra), mRNA [NM_178060] |  |

| Table S6: oligonucleotides used for RTqPCR studies |                                              |                                    |
|----------------------------------------------------|----------------------------------------------|------------------------------------|
| Gene symbol                                        | Category                                     | Sequence (5'-3') forward / reverse |
| Ppib                                               | Housekeeping gene                            | CAC CAA TGG CTC ACA GTT CTT        |
|                                                    |                                              | ATG ACA TCC TTC AGT GGC TTG        |
| Dio1                                               | Thyroid hormone deiodinase selenoenzyme      | AGA GAG CCA GAT TCC TGT GC         |
|                                                    |                                              | GCT TGT AGG AAC CAT AGG CAT TGG    |
| Mct10                                              | Thyroid hormone transporter                  | CAA GGA CGA TGA CAA CAT GG         |
|                                                    |                                              | GTC CGT GAA GAC ACT CAC GA         |
| Lgr5                                               | Active stem cell marker                      | GAC AAT GCT CTC ACA GAC            |
|                                                    |                                              | GGA GTG GAT TCT ATT ATT ATG G      |
| Ascl2                                              | Active stem cell marker                      | CCT ATG CCT TAC CCA TGC T          |
|                                                    |                                              | TTT CCA AGT CCT GAT GCT G          |
| mTert                                              | Facultative stem cell marker                 | GCA GGT GAA CAG CCT CCA GAC AG     |
|                                                    |                                              | TCC TAA CAC GCT GGT CAA AGG GAA GC |
| Olfm4                                              | Active stem cell marker                      | CTG TGG GCA ATT TAT GCA ACT        |
|                                                    |                                              | CAG ATG GCT TGT ACT GCT TGG        |
| Msi1                                               | Active and reserve stem cell marker          | ATG CTG GGT ATT GGG ATG CT         |
|                                                    |                                              | CGG GGA ACT GGT TGT AA             |
| Hopx                                               | Facultative stem cell marker                 | CAT CCT TAG TCA GAC GCG CA         |
|                                                    |                                              | AGG CAA GCC TTC TGA CCG C          |
| Jag1                                               | Voie Notch, TR $\alpha$ 1 direct target gene | ACCAAGCTCAAGATCAAAAA               |
|                                                    |                                              | TTTATTGCCAGGAACAACAC               |
| Ctnnb1                                             | Voie Wnt, TR $\alpha$ 1 direct target gene   | AGCCGAGATGGCCCAGAAT                |
|                                                    |                                              | AAGGGCAAGGTTTCGAATCAA              |
| Ccmd1                                              | Cell cycle, cell proliferation               | CAGAGGCGGATGAGAACAAGT              |
|                                                    |                                              | GCGGTAGCAGGAGAGGAAG                |

| <b>Table S7: antibodies used</b>           |                          |                |                 |
|--------------------------------------------|--------------------------|----------------|-----------------|
| <b>Western blot</b>                        |                          |                |                 |
| <b>Antigen</b>                             | <b>Brand, Ref</b>        | <b>Species</b> | <b>Dilution</b> |
| CASPASE 3                                  | Cell signaling, 9661     | Rabbit         | 1/1000          |
| PHOSPHO H3                                 | Santa cruz, sc-10809     | Rabbit         | 1/500           |
| $\beta$ -ACTIN                             | Sigma, A5316             | Mouse          | 1/10000         |
| Secondary antibody HRP-conjugated          | Promega, W4011           | Anti Rabbit    | 1/10000         |
|                                            | Promega, W4021           | Anti Mouse     | 1/10000         |
| <b>Immunolabeling</b>                      |                          |                |                 |
| GFP                                        | Millipore, AB16901       | Chicken        | 1/500           |
| CASPASE 3                                  | Cell signaling, 9661     | Rabbit         | 1/100           |
| CHGA                                       | Zymed, 18-0094           | Rabbit         | 1/500           |
| LYZ                                        | Abcam, ab108508          | Mouse          | 1/500           |
| MUC2                                       | Santa Cruz, sc-15334     | Rabbit         | 1/100           |
| KI67                                       | Abcam, ab16667           | Rabbit         | 1/200           |
| OLFM4                                      | Abcam, ab85046           | Rabbit         | 1/200           |
| PCNA                                       | Dako, M0879              | Mouse          | 1/1000          |
| Secondary antibody Fluorescence-conjugated | Molecular Probes, A10042 | Anti Rabbit    | 1/1000          |
|                                            | Molecular Probes, A11039 | Anti Chicken   | 1/500           |
|                                            | Molecular Probes, A11004 | Anti Mouse     | 1/1000          |
